# Supplementary material for: The hsa_circ_0007396-miR-767-3p-CHD4 axis is involved in the progression and carcinogenesis of gastric cancer
Source: PubMed Central journal article supplement — J Gastrointest Oncol. 2022 Dec;13(6):2885–902. doi: 10.21037/jgo-22-1218 (PMC9830344; doi:10.21037/jgo-22-1218), 2022-12
Supplement: jgo-13-06-2885-dss.pdf [file jgo-13-06-2885-dss.pdf]

## Data Sharing Statement

|                     |                                                                                                                                                     |                                                                                                                                              |
|---------------------|-----------------------------------------------------------------------------------------------------------------------------------------------------|----------------------------------------------------------------------------------------------------------------------------------------------|
| <b>Article Info</b> | <a href="https://dx.doi.org/10.21037/jgo-22-1218">https://dx.doi.org/10.21037/jgo-22-1218</a>                                                       |                                                                                                                                              |
| <b>Item</b>         | <b>Question</b>                                                                                                                                     | <b>Authors' Response<br/>(place "-" if not applicable)</b>                                                                                   |
| 1                   | Would you like to share data collected for your study to others?                                                                                    | Yes.                                                                                                                                         |
| 2                   | If not, would you like to share the reason for your decision?                                                                                       | -                                                                                                                                            |
| 3                   | What data in particular will be shared?                                                                                                             | The analysis results of this study can be shared.                                                                                            |
| 4                   | Any other documents will be shared? Such as study protocol, statistical analysis plan, informed consent form, clinical study report, analytic code. | Study protocol and statistical analysis plan will also be shared if required.                                                                |
| 5                   | When will data availability begin?                                                                                                                  | When the article is published online.                                                                                                        |
| 6                   | When will data availability end?                                                                                                                    | Two years within the publication date.                                                                                                       |
| 7                   | To whom will you share the data?                                                                                                                    | Any researchers interested in the hsa_circ_0007396-miR-767-3p-CHD4 axis is involved in the progression and carcinogenesis of gastric cancer. |
| 8                   | For what type of analysis or purpose?                                                                                                               | It can be used to study the hsa_circ_0007396-miR-767-3p-CHD4 axis is involved in the progression and carcinogenesis of gastric cancer        |
| 9                   | How or where can the data/documents be obtained?                                                                                                    | By email: 124278956@qq.com.                                                                                                                  |
| 10                  | Any other restrictions?                                                                                                                             | We may balance the potential benefits and risks for each request and then provide the data that could be shared.                             |
